# Supplementary material
Source: PubMed Central journal article supplement (PMC2790252)
Supplement: tjp0587-5107-SD1.pdf [file tjp0587-5107-SD1.pdf]

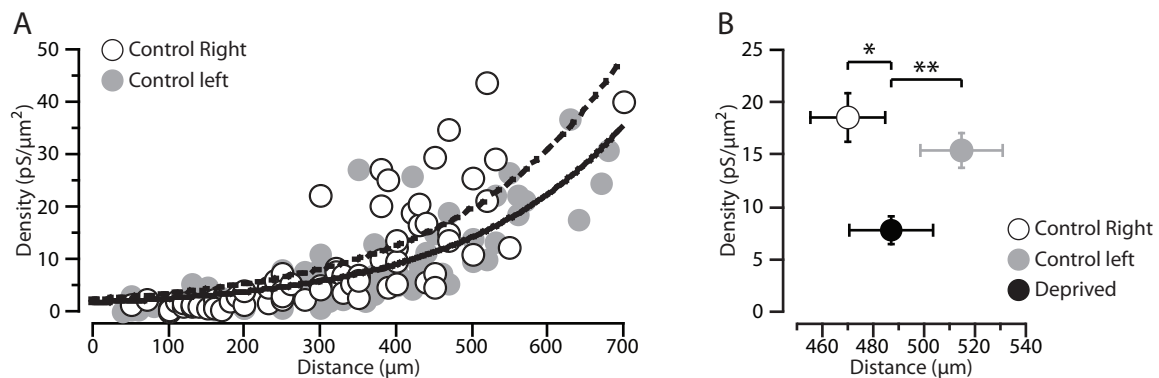

### Supplemental Figure S1: Absence of right-left hemisphere asymmetry in HCN channel density in control conditions.

A: The graph shows a plot of dendritic HCN channel density during voltage steps to an estimated membrane potential of -150 mV versus distance of the dendritic recording location from the soma in recordings from control (non-deprived) neurons from the right (open symbols, n=68) and the left hemisphere (closed symbols, n=66). The curves represent exponential fits to the data sets from the right (dotted curve, distance constant ( $\lambda$ ): 219  $\mu\text{m}$ ) and left hemisphere (solid curve,  $\lambda$ : 214  $\mu\text{m}$ ). B: Graph showing the mean HCN channel density for distal dendritic recordings (>400  $\mu\text{m}$  from the soma) from control (right and left hemispheres; n=22 and n=26, respectively) compared to deprived neurons (n=14). There was no difference in HCN density between neurons from the right and left hemisphere in control condition at distal dendritic locations. In contrast, the HCN channel density is significantly decreased following sensory deprivation compared to control neurons. Data shown as mean  $\pm$  SEM. \*P<0.05, \*\*P<0.01.
